# Supplementary material for: Formulation and Characterization of Soybean Oil-in-Water Emulsions Stabilized Using Gelatinized Starch Dispersions from Plant Sources
Source: MDPI journal article supplement (doi:10.3390/molecules29091923), 2024-04-23
Supplement: s1 [file s1]

## **Supplementary Information**

### **Formulation, Characterization, and Storage Evaluation of Oil-in-Water Emulsions Stabilized Using Gelatinized Starch Dispersions from Plant Sources**

Ankita Singh <sup>1,2</sup>, Takumi Umeda <sup>1</sup> and Isao Kobayashi <sup>1,3,\*</sup>

<sup>1</sup> Institute of Food Research, National Agriculture and Food Research Organization, 2-1-12 Kannodai, Tsukuba 305-8642, Ibaraki, Japan

<sup>2</sup> Graduate School of Science and Technology, University of Tsukuba, 1-1-1 Tennodai, Tsukuba 305-8572, Ibaraki, Japan

<sup>3</sup> School of Integrative and Global Majors, University of Tsukuba, 1-1-1 Tennodai, Tsukuba 305-8577, Ibaraki, Japan

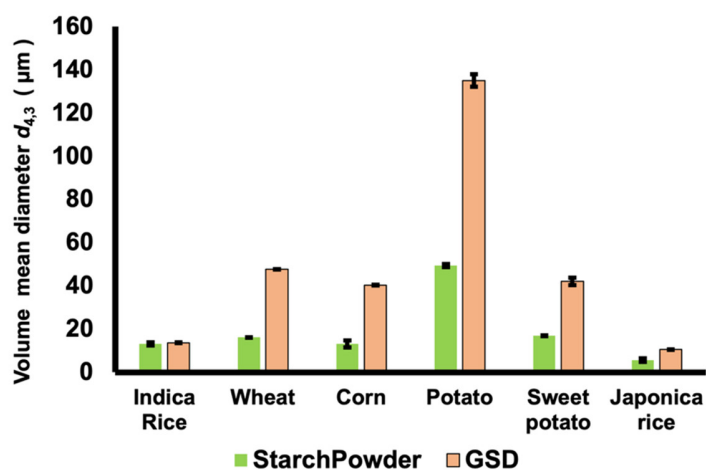

**Figure S1.** Variation in volume mean diameter ( $d_{4,3}$ ) of starch powder and gelatinized starch dispersions (GSDs)

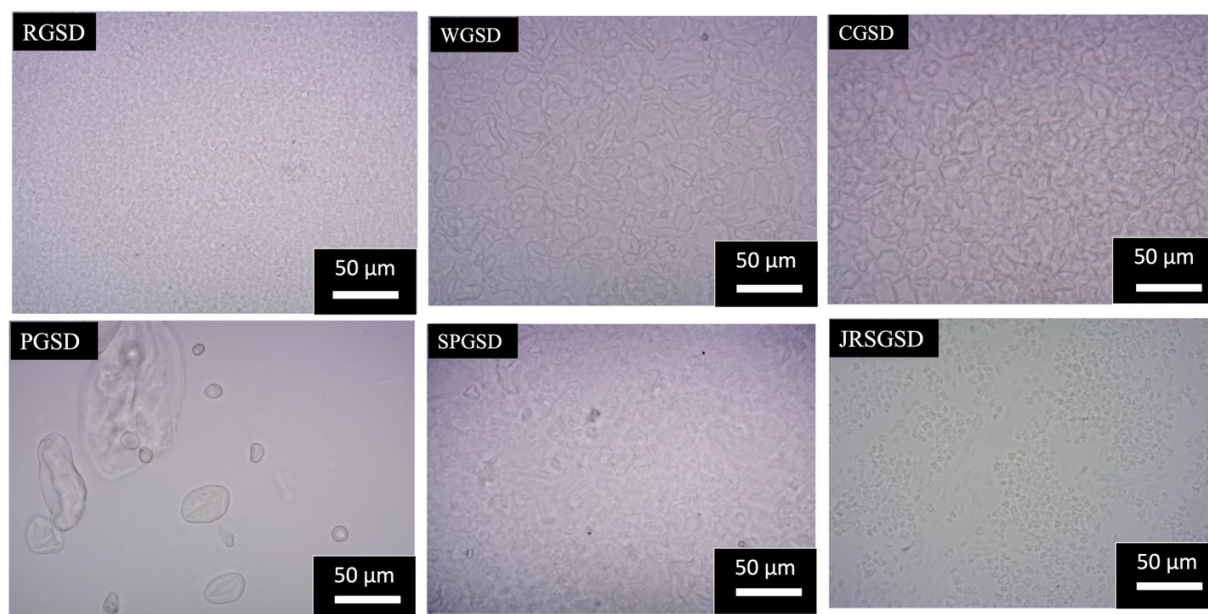

**Figure S2.** Optical micrographs of GSDs at 25°C on formulation day. RGSD, *indica* rice gelatinized starch dispersion; WGSD, wheat gelatinized starch dispersion; CGSD, corn gelatinized starch dispersion; SPGSD, sweet potato gelatinized starch dispersion; PGSD, potato gelatinized starch dispersion; JRSGSD, Japonica rice gelatinized starch dispersion

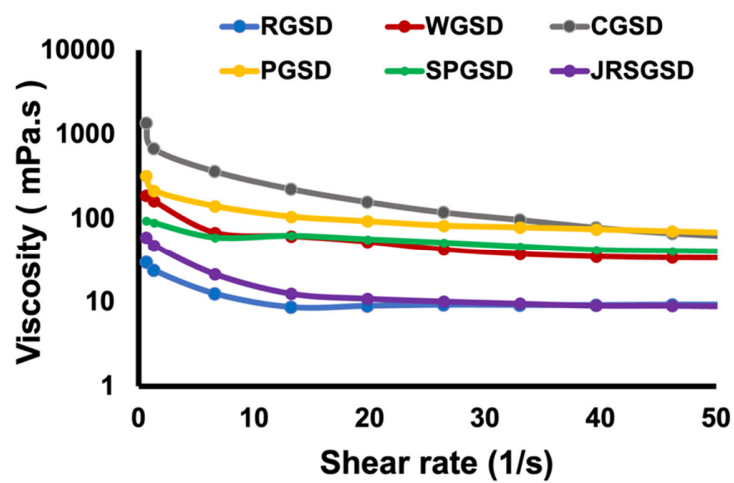

**Figure S3.** Viscosity at formulation day (var. with shear rates for RGSD, WGSD, CGSD, SPGSD, PGSD, and JRSGSD)

**Table S1.** Polysaccharide composition of starch (Megazyme Con A method)

| Polysaccharides       | <i>Indica</i> rice | Wheat       | Corn       | Potato     | Sweet potato | <i>Japonica</i> rice |
|-----------------------|--------------------|-------------|------------|------------|--------------|----------------------|
| Amylose (% (w/w))     | 20.61± 0.48        | 26.25± 1.25 | 29.85±1.55 | 14.80±0.10 | 19.9±0.20    | 13.85±0.55           |
| Amylopectin (% (w/w)) | 79.28±0.58         | 73.7±1.2    | 70.1±1.6   | 85.15±0.05 | 80.05±0.55   | 86.15±0.55           |

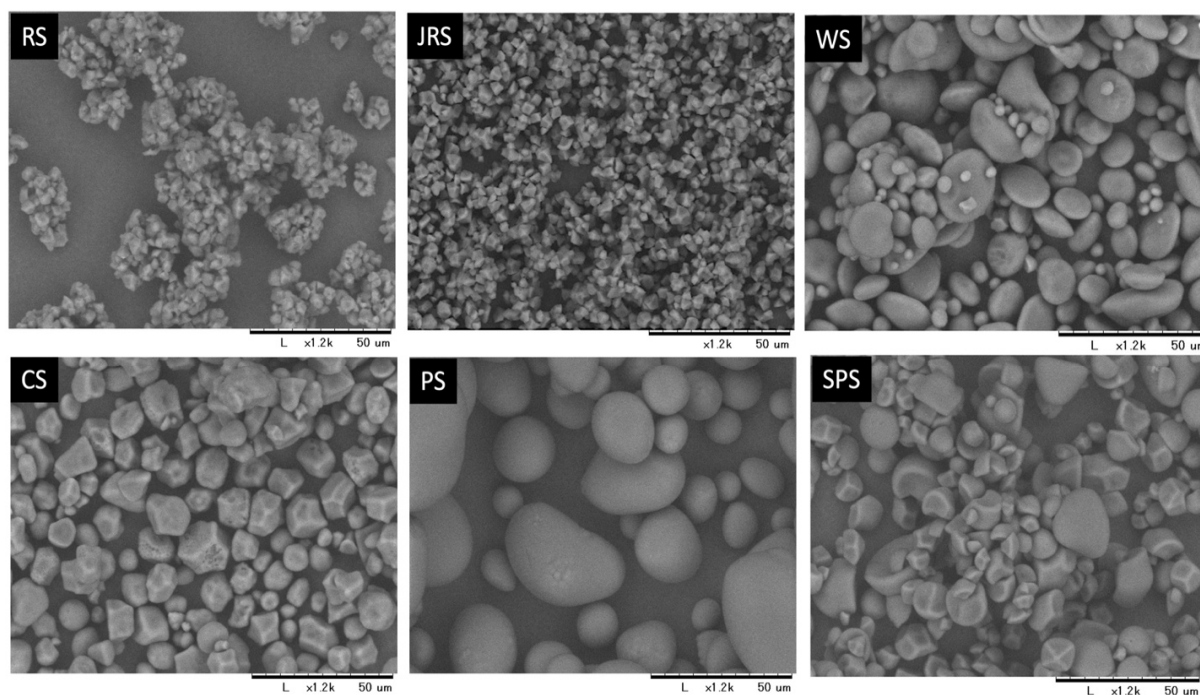

**Figure S4.** Scanning electron microscope (SEM) images of the starch powders. RS, indica rice starch; JRS, japonica rice starch; WS, wheat starch; CS, corn starch; potato starch; SPS, sweet potato starch;

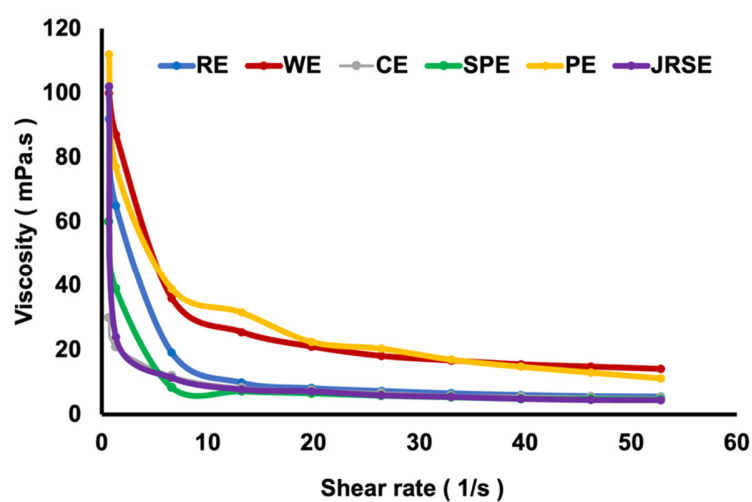

**Figure S5.** Formulation day viscosity of the GSD-stabilized soybean oil in water (O/W) emulsion. CE: corn GSD-stabilized (O/W) emulsion, SPE: Sweet potato GSD-stabilized (O/W) emulsion, PE: potato GSD-stabilized (O/W) emulsion, JRSE: *japonica* rice GSD-stabilized (O/W) emulsion, RE: *indica* rice GSD stabilized (O/W) emulsion, WE: Wheat GSD stabilized (O/W) emulsion

**Table S2.** Zeta potential of the GSD-stabilized O/W emulsion on the day of formulation

| GSD stabilized O/W emulsion | Zeta-potential (mV) |
|-----------------------------|---------------------|
| RE                          | -32.4±1.72          |
| WE                          | -28±1.58            |
| CE                          | -27.8±1.66          |
| PE                          | -32.3±0.46          |
| SPE                         | -29.4±0.29          |
| JRSE                        | -41.2±0.78          |

**Table S3.** Thermal properties of native starch powders

| Starch                   | T <sub>o</sub> (°C) | T <sub>p</sub> (°C) | T <sub>c</sub> (°C) | Δ H <sub>gel</sub> (J g <sup>-1</sup> ) |
|--------------------------|---------------------|---------------------|---------------------|-----------------------------------------|
| Rice ( <i>Indica</i> )   | 59.765±0.33         | 68.7±0.22           | 79.66±0.6           | 11.87±0.67                              |
| Rice ( <i>Japonica</i> ) | 63.59±0.42          | 71.72±0.41          | 79.67±0.29          | 14.43±0.85                              |
|                          |                     |                     |                     |                                         |
| Wheat                    | 56.04±0.02          | 63.35±0.57          | 71.21±0.53          | 10.74±0.05                              |
| Corn                     | 66.91±0.41          | 72.38±1.03          | 80.07±1.03          | 13.51±0.25                              |
| Potato                   | 62.71±0.27          | 68.71±0.71          | 76.48±0.93          | 18.52±1.89                              |
| Sweet Potato             | 67.83±0.39          | 79.27±0.23          | 87±0.07             | 15.41±0.46                              |

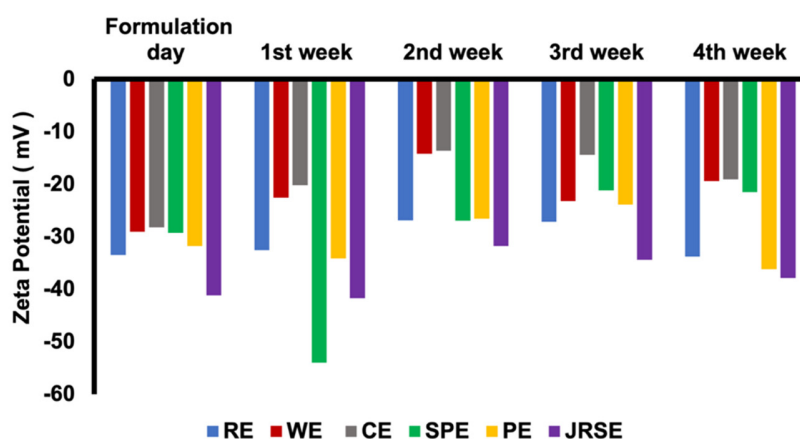

**Figure S6.** Zeta ( $\zeta$  -) potential of the GSD-stabilized soybean oil in water (O/W) emulsions during 4 weeks of storage at 5 °C

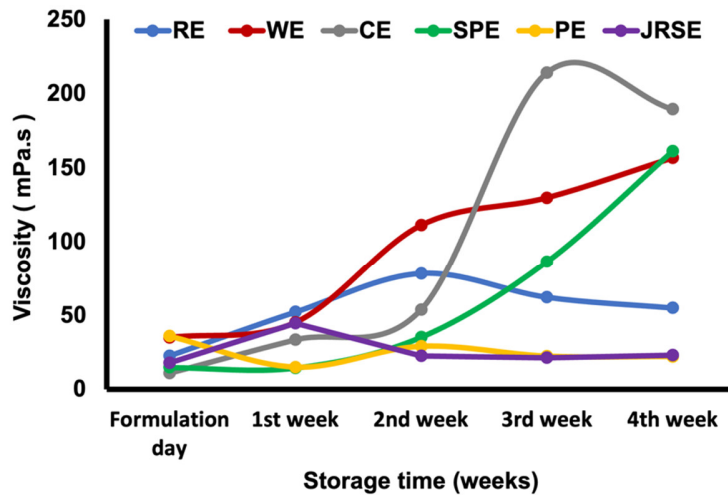

Figure S7. Viscosity of the GSD-stabilized soybean oil in water (O/W) emulsions during 4 weeks of storage at 5 °C

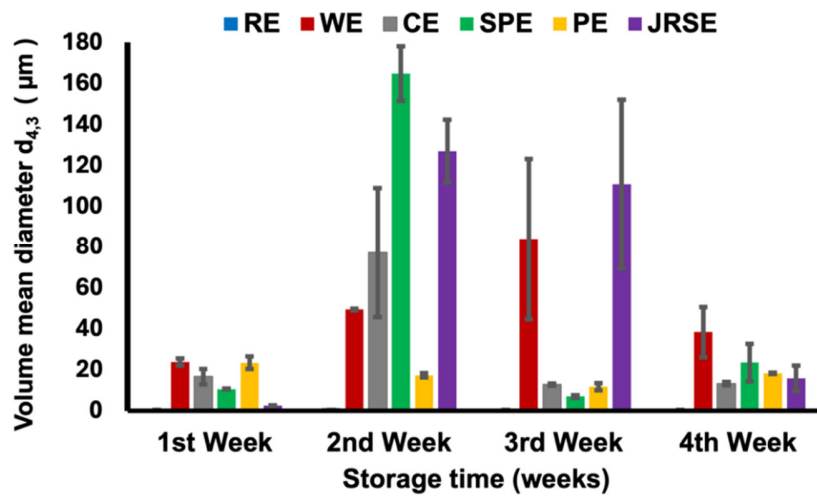

Figure S8. Volume mean diameter ( $d_{4,3}$ ) of the GSD-stabilized soybean oil in water (O/W) emulsions during 4 weeks of storage at 5 °C



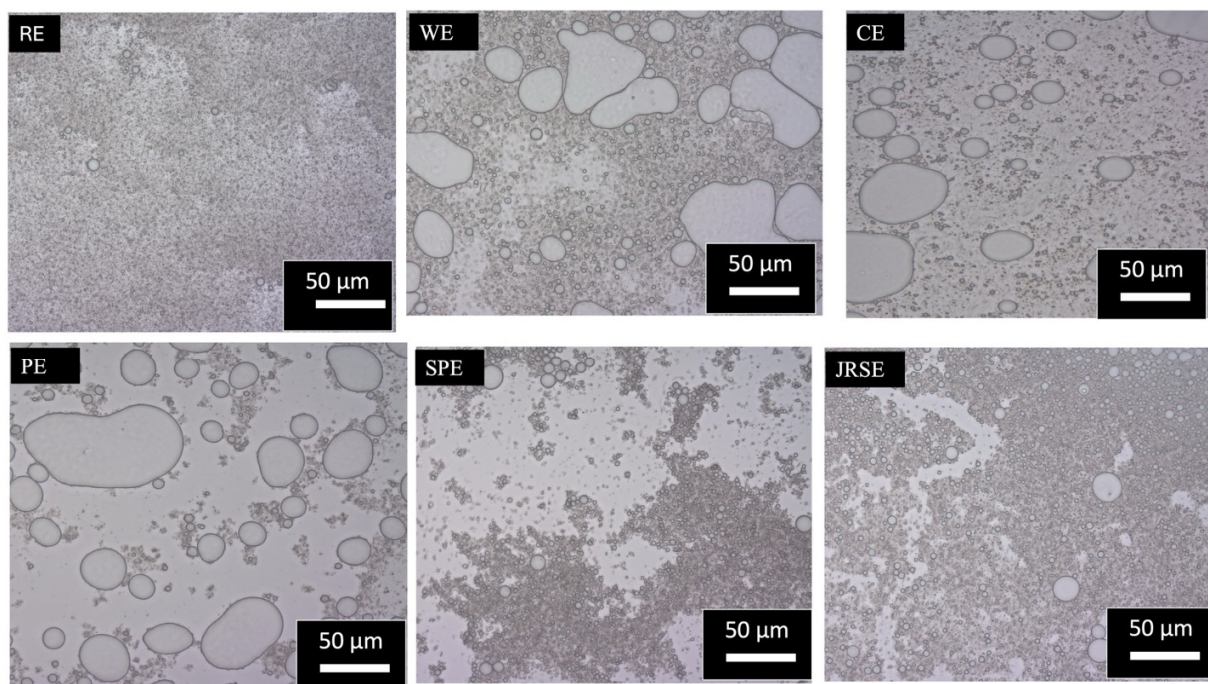

**Figure S9.** Optical micrographs of GSD stabilized O/W emulsions after 4 weeks of storage at 5°C (RE: *Indica* rice GSD stabilized (O/W) emulsion, WE: Wheat GSD stabilized (O/W) emulsion, CE: Corn GSD stabilized (O/W) emulsion, SPE: Sweet potato GSD stabilized (O/W) emulsion, PE: Potato GSD stabilized (O/W) emulsion, JRSE: *Japonica* rice GSD stabilized (O/W) emulsion).

(a)

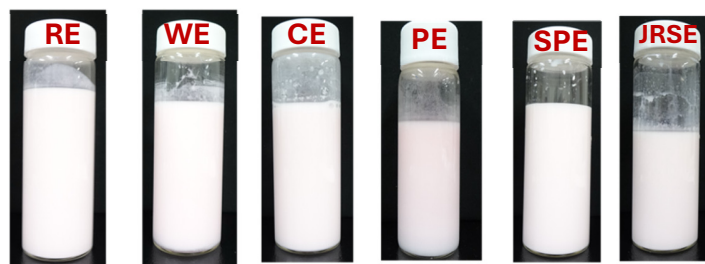

(b)

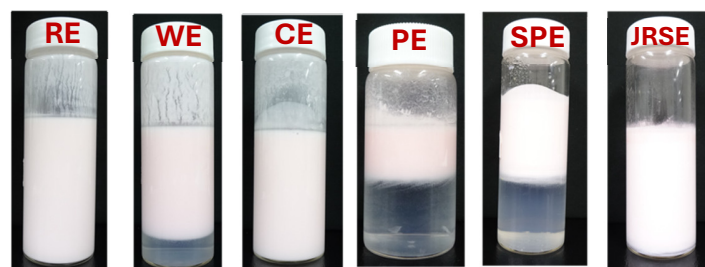

**Figure S10.** Images of GSD-stabilized O/W emulsions on formulation day (a) and after 4 weeks of storage at 25°C (b)

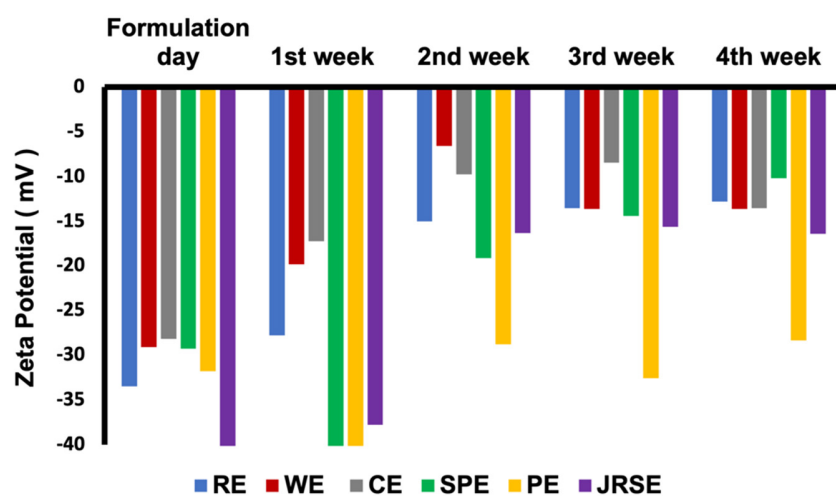

Figure S11. Zeta ( $\zeta$  -) potential of the GSD-stabilized soybean oil in water (O/W) emulsions during 4 weeks of storage at 45 °C

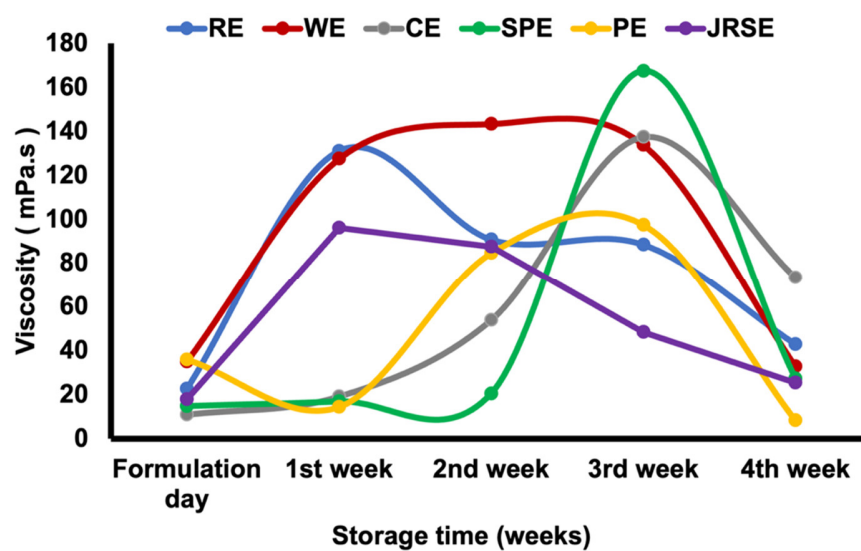

Figure S12. Viscosity of the GSD-stabilized soybean oil in water (O/W) emulsions during 4 weeks of storage at 45 °C



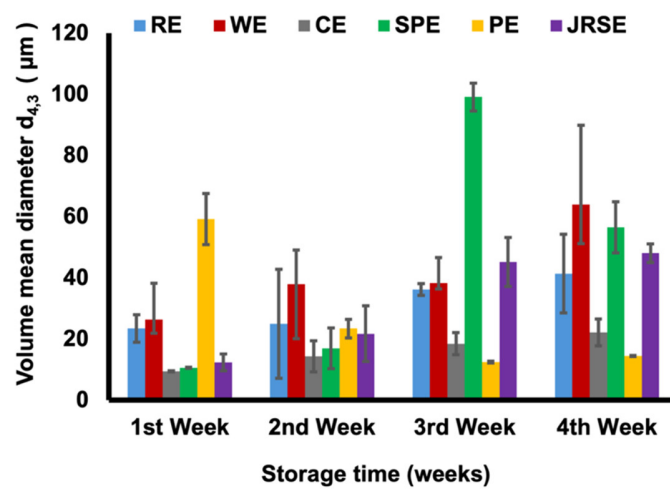

**Figure S13.** Volume mean diameter ( $d_{4,3}$ ) of the GSD-stabilized soybean oil in water (O/W) emulsions during 4 weeks of storage at 45 °C

(a)

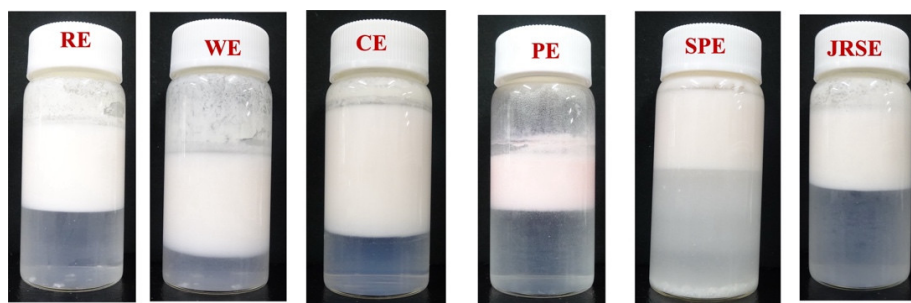

(b)

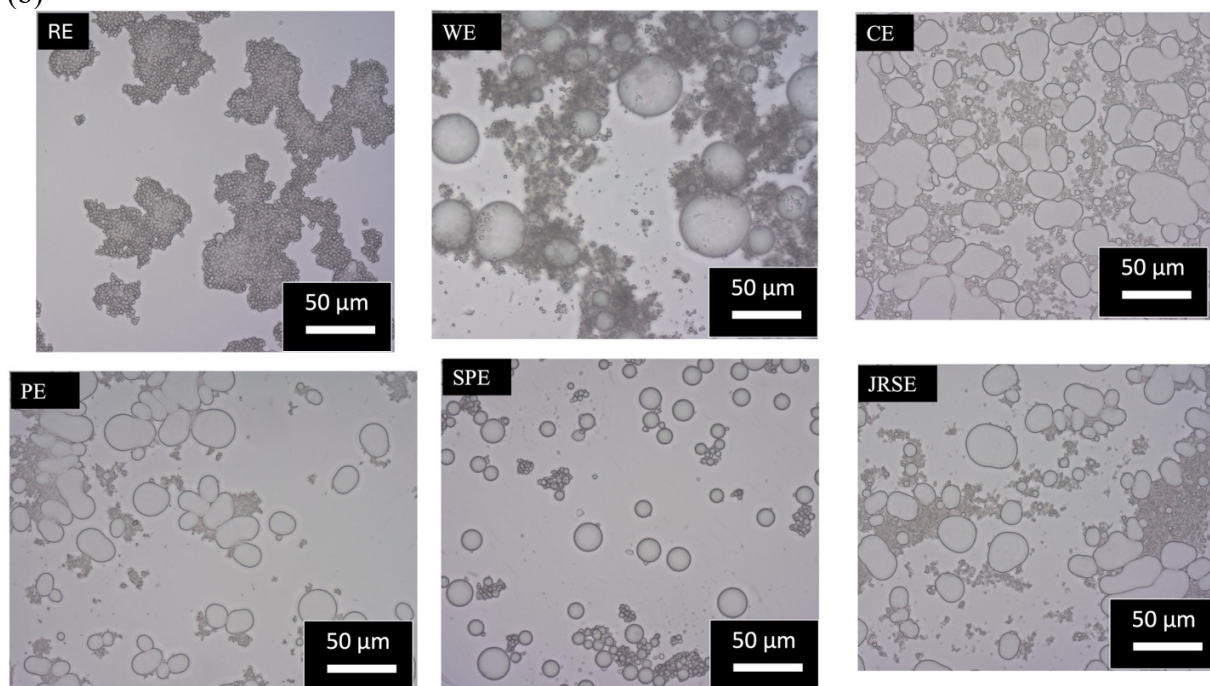

**Figure S14.** Images (a) and optical micrographs (b) of GSD stabilized O/W emulsions after 4 weeks of storage at 45°C

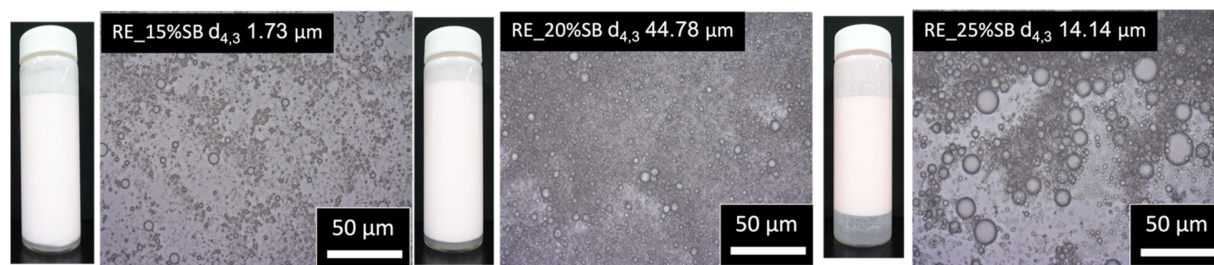

**Figure S15.** Images and optical micrographs of the GSD-stabilized (high oil weight fraction) emulsions after 4 weeks of storage at 25 °C. RE\_15%, RE\_20%, and RE\_25% indicate *indica* rice GSD-stabilized (O/W) emulsions at 15%, 20%, and 25% soybean oil weight fractions, respectively

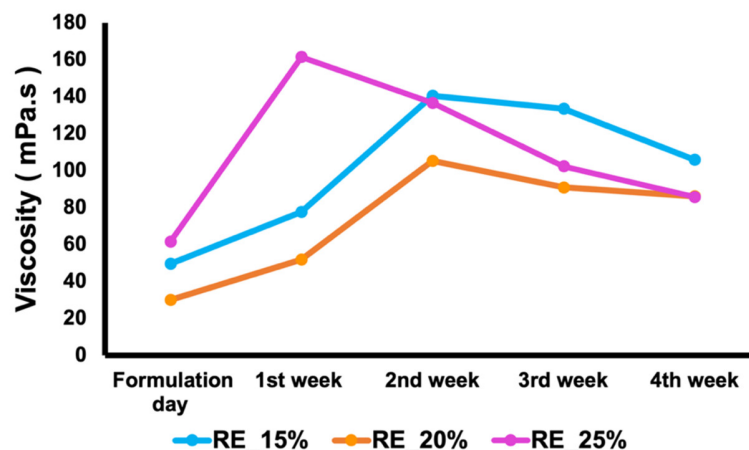

**Figure S16.** Viscosity of the GSD-stabilized (high oil weight fraction) soybean oil in water (O/W) emulsions during 4 weeks of storage at 25 °C

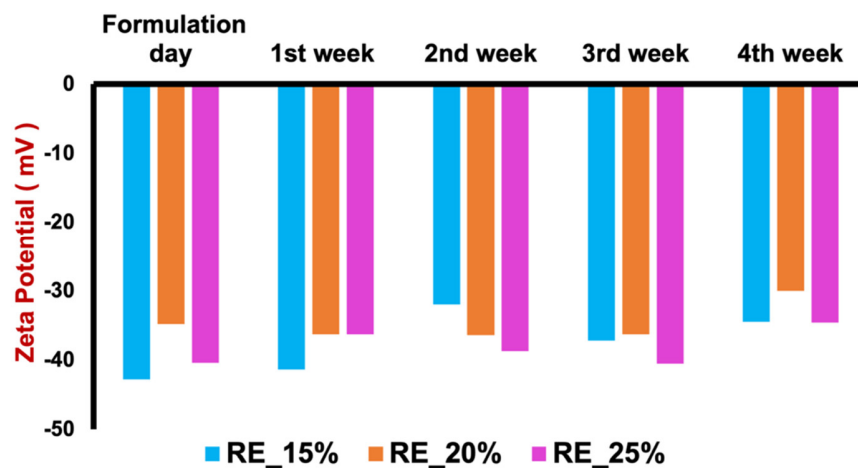

**Figure S17.** Zeta-potential of the GSD-stabilized (high oil weight fraction) soybean oil in water (O/W) emulsions during 4 weeks of storage at 25 °C
